# Progression to Active Tuberculosis, but Not Transmission, Varies by *Mycobacterium tuberculosis* Lineage in The Gambia

Bouke C. de Jong,<sup>1,2,a</sup> Philip C. Hill,<sup>1</sup> Alex Aiken,<sup>1</sup> Timothy Awine,<sup>1</sup> Martin Antonio,<sup>1</sup> Ifedayo M. Adetifa,<sup>1</sup> Dolly J. Jackson-Sillah,<sup>1</sup> Annette Fox,<sup>1</sup> Kathryn DeRiemer,<sup>3</sup> Sebastien Gagneux,<sup>4</sup> Martien W. Borgdorff,<sup>5,6</sup> Keith P. W. J. McAdam,<sup>1</sup> Tumani Corrah,<sup>1</sup> Peter M. Small,<sup>4</sup> and Richard A. Adegbola<sup>1</sup>

<sup>1</sup>Bacterial Diseases Programme, Medical Research Council Laboratories, Banjul, The Gambia; <sup>2</sup>Stanford University, Stanford, and <sup>3</sup>University of California, Davis; <sup>4</sup>Institute for Systems Biology, Seattle, Washington; <sup>5</sup>University of Amsterdam, Amsterdam, and <sup>6</sup>Royal Netherlands Tuberculosis Association, The Hague, The Netherlands

**Background.** There is considerable variability in the outcome of *Mycobacterium tuberculosis* infection. We hypothesized that *Mycobacterium africanum* was less likely than *M. tuberculosis* to transmit and progress to tuberculosis disease.

**Methods.** In a cohort study of patients with tuberculosis and their household contacts in The Gambia, we categorized 1808 HIV-negative tuberculosis contacts according to exposure to *M. tuberculosis* or *M. africanum*. Positive skin test results indicated transmission, and development of tuberculosis during 2 years of follow-up indicated progression to disease.

**Results.** Transmission rates were similar, but rates of progression to disease were significantly lower in contacts exposed to *M. africanum* than in those exposed to *M. tuberculosis* (1.0% vs. 2.9%; hazard ratio [HR], 3.1 [95% confidence interval {CI}, 1.1–8.7]). Within *M. tuberculosis sensu stricto*, contacts exposed to a Beijing family strain were most likely to progress to disease (5.6%; HR relative to *M. africanum*, 6.7 [95% CI, 2.0–22]).

**Conclusions.** *M. africanum* and *M. tuberculosis* transmit equally well to household contacts, but contacts exposed to *M. africanum* are less likely to progress to tuberculosis disease than those exposed to *M. tuberculosis*. The variable rate of progression by lineage suggests that tuberculosis variability matters in clinical settings and should be accounted for in studies evaluating tuberculosis vaccines and treatment regimens for latent tuberculosis infection.

Tuberculosis remains a significant public health problem, particularly in settings with limited resources [1]. The considerable variability in the outcome of *Mycobacterium tuberculosis* infection has usually been attributed to host and environmental factors [2, 3]; indeed, host immune suppression, such as that caused by HIV infection, is the strongest known risk factor for the develop-

ment of active tuberculosis [4]. However, pathogen-related factors may also play a role [5]. Although distinct genotypes have been identified in the *Mycobacterium tuberculosis* complex, it is unclear whether these translate into phenotypic differences in humans [6].

Significant strain differences between *Mycobacterium bovis* and *M. tuberculosis* were identified early in the history of mycobacteriology [7], and several experimental studies have shown that *M. tuberculosis* strains can differ in immunogenicity and virulence in animal models [8]. Recent advances in genotyping now allow more detailed analyses of the contribution of bacterial factors to the variability in transmission and rates of progression to tuberculosis disease in its natural human host [9]. In population-based studies, these techniques have identified clustered isolates of *M. tuberculosis* (i.e., with identical genotypes) [10, 11]. Although clustering is suggestive of recent transmission, these studies were unable to distinguish between rates of transmission and rates of

Received 25 February 2008; accepted 11 April 2008; electronically published 14 August 2008.

Potential conflicts of interest: none reported.

Presented in part: Tuberculosis: From Lab Research to Field Trials (Keystone Symposium), Vancouver, British Columbia, Canada, 20–25 March 2007 (abstract 170).

Financial support: Medical Research Council; European Commission; National Institutes of Health (grant TW006083 to B.C.d.J.).

<sup>a</sup> Present affiliation: New York University.

Reprints or correspondence: Dr. Bouke de Jong, MRC Laboratories, PO Box 273, Banjul, The Gambia (bdejong@mrc.gm).

The Journal of Infectious Diseases 2008; 198:1037–43

© 2008 by the Infectious Diseases Society of America. All rights reserved.

0022-1899/2008/19807-0013\$15.00

DOI: 10.1086/591504

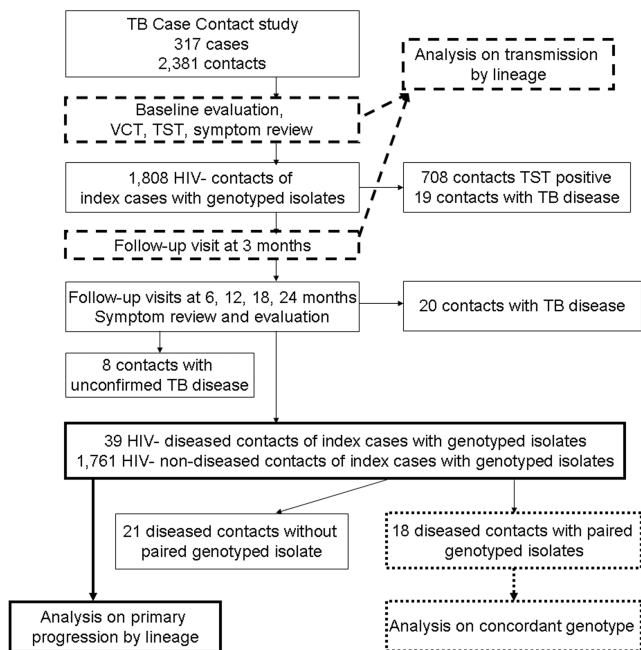

**Figure 1.** Flow diagram of analyses. TB, tuberculosis; TST, tuberculin skin test; VCT, voluntary counseling and testing for HIV infection.

progression to tuberculosis disease. A different study described an outbreak strain associated with high rates of tuberculin skin test (TST) conversion in contacts compared with historical control subjects [12]. In the context of a household study of tuberculosis in The Gambia, where *Mycobacterium africanum* is endemic, we assessed the likelihood of transmission and of progression to tuberculosis disease according to mycobacterial lineage. We specifically tested 2 hypotheses: that *M. africanum* would be less likely than *M. tuberculosis* to be transmitted and that it would be less likely to cause disease.

## METHODS

In the Tuberculosis Case-Contact Study, we followed up 317 adult tuberculosis index case patients (sputum smear positive) and 2381 of their household contacts (figure 1). Participants were recruited between September 2002 and September 2004 and were followed up for 2 years. Household members were eligible for inclusion in the study if they had been sleeping in the same compound (walled group of houses) as the index case patient during the period of illness with tuberculosis. Household contacts underwent a TST (PPD R23 2TU; Statens Serum Institute), performed using the Mantoux technique. Those with negative TST results (induration of <10 mm) underwent another test after 3 months. There was no practice of treating asymptomatic TST-positive persons for latent infection in The Gambia.

**Follow-up.** Five follow-up visits were made to each of the 317 households, at 3, 6, 12, 18, and 24 months after enrollment. Any participant who reported tuberculosis symptoms at these

visits was encouraged to present to the Medical Research Council (MRC) tuberculosis clinic and had free access to treatment for any illness during this period. At each household visit, we reevaluated each individual for symptoms of tuberculosis. Any patients with symptoms of pulmonary disease underwent chest radiography and sputum analysis (3 samples) for acid-fast bacilli (AFB; smear analysis and culture). If tuberculosis disease was bacteriologically confirmed or clinically suspected in smear-negative or extrapulmonary cases, patients were referred to the Gambian National Tuberculosis Treatment Program for the standard 6-month course of tuberculosis treatment. A diagnosis of tuberculosis disease among household contacts during the 2-year follow-up period was used as the main outcome variable for the analysis of progression to tuberculosis by mycobacterial lineage.

**Case definition.** All contacts with symptoms consistent with tuberculosis (fever, night sweats, and persistent cough) or with a positive TST result at enrollment or at the 3-month follow-up visit were offered a chest radiograph and 3 sputum tests if they had a productive cough. On the basis of the results of the chest radiograph, sputum smear, and culture and/or their response to a trial tuberculosis treatment course with the standard 4-drug regimen, contacts were classified as nondiseased or diseased (secondary case patients; see definitions in the section on statistical analysis). A positive TST result was not an essential element of the case definition.

In addition to the identification of secondary case patients presenting at the MRC clinic and during follow-up visits, the names and ages of all tuberculosis case patients treated at the government health clinics during the course of the study were recorded. Those who matched contacts participating in our study (on the basis of age-category matching within 5 years of the stated age on the government record) were visited again to confirm whether they had received tuberculosis treatment. Those who confirmed treatment were asked to undergo chest radiography to look for evidence of tuberculosis. The radiographs were reviewed by 2 physicians experienced in infectious diseases and a pediatrician if the participant was a child. After review, a consensus opinion was formed on the presence or absence of tuberculosis. Contacts with symptoms compatible with tuberculosis but with insufficient information to support a diagnosis of tuberculosis for this study were classified as unconfirmed secondary case patients.

**Laboratory procedures.** Sputum from index case patients and symptomatic contacts was examined for AFB by the auramine and Ziehl-Nielsen methods. Decontaminated sputum was cultured both in liquid medium (BACTEC 9000; Becton Dickinson) and on Lowenstein-Jensen slopes, prepared as described elsewhere [13]. Symptomatic contacts who presented directly to the Gambian government tuberculosis clinic had sputum examined for AFB but not stored for culture and genotyping.

HIV testing was restricted to those who either wanted to know their result or were selected for full immunological testing by skin test and enzyme-linked immunospot (ELISPOT) assay. Those individuals who tested positive for HIV-1 and/or HIV-2 were referred to the on-site MRC HIV clinic, where they were eligible for antiretroviral therapy.

**Genotyping methods.** Clinical isolates were characterized molecularly by means of spoligotype analysis [14], resulting in a binary pattern based on the presence or absence of 43 spacers. In addition, we performed polymerase chain reactions for large-sequence polymorphisms [15] based on phylogenetically informative regions of difference (RDs). This resulted in classification in 1 of 12 lineages, including the subspecies *M. africanum* (RD702) and 11 lineages within *M. tuberculosis* sensu stricto. The main lineages within *M. tuberculosis* sensu stricto included the Beijing family (RD105), lineage RD174 with a deletion in the DosR regulon, and lineages RD182 and RD219.

**Genotypic definition.** Recently, molecular techniques have identified 2 lineages within the true *M. africanum* type I: West African type 1, which is phylogenetically closer to *M. tuberculosis* and is found predominantly around the gulf of Guinea, and West African type 2, which is phylogenetically closer to *M. bovis* and is confined to the western parts of West Africa [9, 16]. In this article, *M. africanum* refers to *M. africanum* type I, West African type 2.

Identical spoligotype patterns (genotypes) in isolates from an index case patient and a diseased contact from the same household were referred to as concordant genotypes, and different patterns were referred to as “discordant genotypes.” Isolates sharing the same spoligotype pattern except for 1 of the 43 spacers were classified as concordant, because these patterns may reflect evidence of direct transmission between household members.

**Ethical approval.** The study was approved by the Gambian government/MRC ethics committee and the Stanford University Institutional Review Board. All participants provided informed consent before enrollment.

**Definitions.** Contacts were classified as prevalent TST positive if they had positive TST results ( $\geq 10$  mm) at recruitment and as incident TST positive if they had negative TST results ( $< 10$  mm) at recruitment and positive results at the 3-month follow-up visit, with induration increased by  $\geq 6$  mm since recruitment. Contacts in whom tuberculosis disease developed (secondary case patients) were classified as having coprevalent tuberculosis if their tuberculosis was diagnosed at recruitment or within 3 months after recruitment and as having incident tuberculosis if their tuberculosis was diagnosed  $\geq 3$  months after recruitment.

**Statistical analysis.** Analysis was done stratifying by subspecies (*M. africanum* vs. *M. tuberculosis*) and by lineage within the subspecies, where lineages with information on  $< 70$  contacts were grouped as other. In the absence of complete myco-

bacterial genotype data for the diseased contacts, we did not correct the analysis of the secondary case patients by lineage for the likelihood of infection with a discordant genotype. Prevalent positive TST results in household contacts and incident TST results at 3 months were used as outcome variables for transmissibility of the different mycobacterial lineages. After confirmation that HIV was an independent predictor of lower TST indurations and of increased progression to disease, analyses of both transmission and progression were limited to known HIV-uninfected contacts. We used the  $\chi^2$  test to test for differences in TST positivity and progression to disease between contacts exposed to the different mycobacterial lineages. We calculated odds ratios and their corresponding 95% confidence intervals (CIs) for positive TST results, using logistic regression and controlling for household clustering. Possible confounders, such as age, presence of a scar from bacille Calmette-Guérin (BCG) vaccination, and sleeping proximity, were added to the model. We used Cox regression models to estimate the hazard ratios (HRs) and 95% CIs for secondary case patients among the contacts of index case patients with *M. tuberculosis* versus *M. africanum* infection (controlling for household clustering) after confirming compliance with the proportional hazards assumption.

We performed several different sensitivity analyses to assess potential biases. A degree of misclassification bias occurred, because not all secondary case patients were infected via their index case patient. To determine whether misclassification bias was important, we removed from the analysis the secondary case patients known to be infected with a discordant genotype. The potential effect of unconfirmed tuberculosis disease was assessed by repeating the analysis with unconfirmed secondary case patients classified as either nondiseased contacts or secondary case patients. The potential effect of including coprevalent secondary case patients in the analysis of progression was assessed by recalculating the HR for incident secondary case patients only.

All analyses were conducted using Stata software (version 9; StataCorp).

## RESULTS

**Study participants.** In a tuberculosis case-contact study, cultured isolates were successfully obtained from 301 index case patients (95%), of whom 291 (97%) had interpretable genotyping patterns. These 291 index case patients had 2174 household contacts, of whom 1853 (85%) underwent HIV testing, with 45 (2.4%) positive results; the 1808 HIV-uninfected contacts were eligible and were included in this study. At recruitment, the TST was administered to 1727 contacts (96%), of whom 708 (41%) tested positive. Of the 1808 HIV-uninfected contacts, 48% were male, and 49% had a scar from BCG vaccination; their median age was 16 years (interquartile range, 8–25 years).

**Mycobacterial genotypes.** The 291 isolates included 12 different lineages within the *M. tuberculosis* complex: 110 isolates of

**Table 1. Tuberculin skin test (TST) results in HIV-uninfected contacts, by lineage within the *Mycobacterium tuberculosis* complex.**

| Lineage                                  | Baseline <sup>a</sup> |                                |                 | Conversion at 3 months <sup>b</sup> |                                |                 |
|------------------------------------------|-----------------------|--------------------------------|-----------------|-------------------------------------|--------------------------------|-----------------|
|                                          | Total contacts, no.   | TST-positive contacts, no. (%) | OR (95% CI)     | Total contacts, no.                 | TST-positive contacts, no. (%) | OR (95% CI)     |
| RD702 ( <i>Mycobacterium africanum</i> ) | 653                   | 253 (39)                       | 1               | 280                                 | 69 (25)                        | 1               |
| RD105 (Beijing)                          | 72                    | 27 (38)                        | 0.90 (0.33–2.4) | 24                                  | 6 (25)                         | 1.3 (0.31–5.7)  |
| RD174 (DosR)                             | 200                   | 84 (42)                        | 1.0 (0.55–1.9)  | 91                                  | 26 (29)                        | 1.2 (0.49–2.7)  |
| RD182                                    | 311                   | 136 (44)                       | 1.3 (0.77–2.3)  | 127                                 | 32 (25)                        | 1.1 (0.48–2.4)  |
| RD219                                    | 84                    | 39 (46)                        | 1.4 (0.58–3.3)  | 33                                  | 5 (15)                         | 0.39 (0.09–1.7) |
| Other                                    | 407                   | 169 (42)                       | 1.2 (0.76–2.0)  | 188                                 | 51 (27)                        | 1.2 (0.59–2.3)  |
| Total                                    | 1727                  | 708 (41)                       | ...             | 743                                 | 189 (25)                       | ...             |

**NOTE.** CI, confidence interval; OR, odds ratio; RD, region of difference (major phylogenetic groups are identified by major large-sequence polymorphisms or deletions).

<sup>a</sup> TST positivity at enrollment.

<sup>b</sup> TST positivity at 3 months in those who tested TST negative at baseline, with conversion defined as a  $\geq 6$ -mm increase in induration.

*M. africanum* (1 lineage) and 181 isolates of *M. tuberculosis sensu stricto* (11 lineages). Detailed genotypic findings are available from the authors upon request.

**Follow-up.** The HIV-uninfected contacts had 3301 person-years of follow-up in total. This yielded 19 contacts with coprevalent tuberculosis (presenting within 3 months of enrollment) and 20 contacts with incident tuberculosis (in whom symptoms consistent with tuberculosis developed  $>3$  months after enrollment), for a total of 39 secondary case patients. The incident tuberculosis case patients are described in detail elsewhere [17]. Their median age was 17 years (range, 2–70 years), and 22 (56%) were male. Six contacts had extrapulmonary tuberculosis, and 33 had pulmonary tuberculosis. Four secondary case patients were identified through the records of the government tuberculosis clinic, with x-ray findings suggestive of (treated) tuberculosis. Eight contacts had symptoms but insufficient information to support a diagnosis of tuberculosis, including 3 who had received tuberculosis treatment but had normal chest x-ray findings afterward; they were excluded from the analysis of the progression to disease.

Paired genotyped isolates from index and secondary case patients were available for 18 of the 39 secondary case patients. Eleven of these 18 paired isolates had identical genotypes; 1 isolate from a secondary case patient lacked 1 additional spacer (of 43) compared with the isolate from the index case patient, and 6 had different genotypes.

**Transmission by mycobacterial lineage.** The prevalence of household contacts with a positive TST result at enrollment was not significantly different between contacts exposed to *M. africanum* and those exposed to *M. tuberculosis* (39% vs. 42%;  $P = .14$ ) or between the lineages within *M. tuberculosis* (table 1). Similarly, the incidence of TST conversion did not differ between lineages or between *M. africanum* and *M. tuberculosis* (25% vs. 26%;  $P = .70$ ). Adding known predictors of TST positivity to the logistic regression model, such as age and sleeping

proximity to the index case patient, did not significantly change these results.

#### Progression to tuberculosis disease by mycobacterial lineage.

Comparing *M. tuberculosis sensu stricto* (all 11 lineages combined) with *M. africanum*, the rate of progression to tuberculosis was 2.9% in household contacts of index case patients with *M. tuberculosis sensu stricto* infection, compared with 1.0% in those with *M. africanum* infection (HR, 3.1 [95% CI, 1.1–8.7]). Figure 2 depicts the results using survival curves, showing significant divergence over time ( $P = .036$ ).

Table 2 shows the likelihood of progression to disease by lineage ( $P = .033$  across lineages). Household contacts for whom the index case patient had tuberculosis caused by a Beijing family isolate of *M. tuberculosis* were more likely to develop tuberculosis disease (5.6%) than contacts of index patients with *M. africanum* infection (1.0%) (HR, 6.7 [95% CI, 2.0–22]) (table 2), but they were not more likely to develop disease than other lineages within *M. tuberculosis sensu stricto*. Contacts of an index patient with the lineage within *M. tuberculosis sensu stricto* defined by RD174, a deletion in part of the DosR regulon, were the second most likely to progress to disease (3.9% in 2 years; HR, 4.4 [95% CI, 1.4–14]).

Progression to tuberculosis in contacts with prevalent or incident positive TST results occurred in 4.9% of contacts of index case patients with *M. tuberculosis sensu stricto* infection versus 2.2% of those with *M. africanum* infection ( $P = .046$ ). When the analyses were repeated with exclusion of the secondary case patients infected with isolates that differed by at least 1 spacer from the isolate for the index patient ( $n = 7$ ), the association between genotype and the number of secondary case patients was stronger (HR for *M. tuberculosis*–exposed relative to *M. africanum*–exposed households, 4.0 [95% CI 1.2–13];  $P = .026$ ). Similarly, when the analyses were repeated excluding the coprevalent case patients ( $n = 19$ ), incident tuberculosis was lower in contacts exposed to *M. africanum* than in those exposed

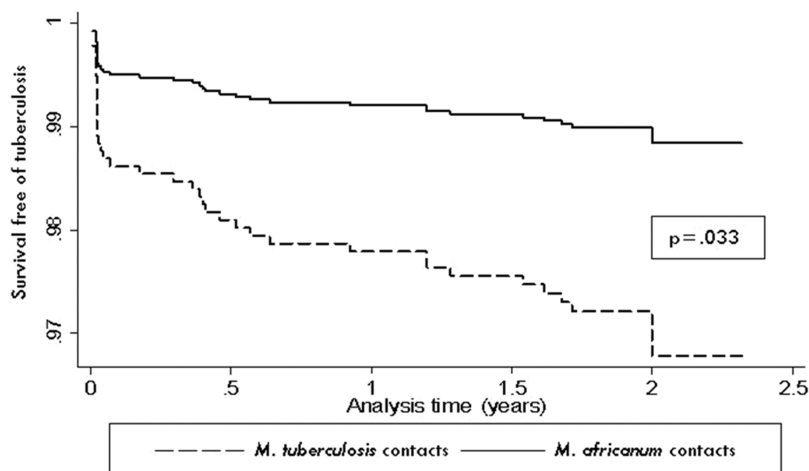

**Figure 2.** Survival curves showing survival free of tuberculosis after exposure to *Mycobacterium africanum* vs. *Mycobacterium tuberculosis*, on the basis of a Cox regression model.

to *M. tuberculosis* (HR, 5.5 [95% CI, 1.3–23];  $P = .020$ ). Finally, when we included contacts who had an unconfirmed tuberculosis diagnosis as case patients ( $n = 8$ ), the incidence of tuberculosis was lower in contacts exposed to *M. africanum* than in those exposed to *M. tuberculosis* (HR, 2.7 [95% CI, 1.2–6.5];  $P = .022$ ).

## DISCUSSION

Although transmission of the *M. tuberculosis* complex from patients with tuberculosis to their household contacts did not vary by strain lineage in The Gambia, the percentage of contacts with incident tuberculosis during the 2-year follow-up varied 5-fold between contacts exposed to the different *M. tuberculosis* lineages. These percentages ranged from 1.0% of contacts in households exposed to *M. africanum* to 5.6% of those exposed to the

Beijing family within *M. tuberculosis sensu stricto* ( $P = .033$ ). The different rate of progression to active tuberculosis between lineages provides strong evidence that pathogen-specific factors are important in the observed variability in outcomes of tuberculosis infection and indicates that the bacterial determinants of transmission and initial infection are distinct from the determinants of progression to disease.

The finding that fewer HIV-negative contacts of *M. africanum* index case patients have incident tuberculosis is consistent with other characteristics of this lineage. We previously reported that *M. africanum*-infected case patients and their contacts were less likely to mount an interferon- $\gamma$  response against early secreted antigenic target (ESAT)-6 than *M. tuberculosis*-infected case patients and contacts [18]. The gene *esat-6*, located in RD1 [16], is a known virulence factor [19] and is thought to play a role in the cell-to-cell spread of *M. tuberculosis* [20]. The sequence of RD1

**Table 2.** Incidence of tuberculosis in HIV-uninfected household contacts, by lineage within the *Mycobacterium tuberculosis* complex.

| Lineage                                  | Contacts, no. | Secondary case patients, no. (%) | Primary progression      |                            |                            |
|------------------------------------------|---------------|----------------------------------|--------------------------|----------------------------|----------------------------|
|                                          |               |                                  | HR (95% CI) <sup>a</sup> | HR (95% CI) <sup>a,b</sup> | HR (95% CI) <sup>a,c</sup> |
| RD702 ( <i>Mycobacterium africanum</i> ) | 681           | 7 (1.0)                          | 1 (reference)            | 1 (reference)              | 1 (reference)              |
| RD105 (Beijing)                          | 72            | 4 (5.6)                          | 6.7 (2.0–22)             | 7.7 (1.9–31)               | 16 (2.8–89)                |
| RD174 (DosR)                             | 204           | 8 (3.9)                          | 4.4 (1.4–14)             | 5.8 (1.5–23)               | 10 (2.2–45)                |
| RD182                                    | 317           | 9 (2.8)                          | 2.8 (0.84–9.5)           | 3.6 (0.92–15)              | 4.2 (0.77–23)              |
| RD219                                    | 86            | 1 (1.2)                          | 1.4 (0.16–12)            | NO                         | 4.2 (0.42–43)              |
| Other                                    | 440           | 10 (2.3)                         | 2.4 (0.74–7.6)           | 3.5 (0.95–13)              | 3.2 (0.60–17)              |
| Total                                    | 1800          | 39 (2.2)                         | ...                      | ...                        | ...                        |

**NOTE.** CI, confidence interval; HR, hazard ratio; NO, no observations; RD, region of difference (major phylogenetic groups are identified by major large-sequence polymorphisms or deletions).

<sup>a</sup> With a random effects model, to account for household clustering.

<sup>b</sup> Excluding secondary case patients whose isolate differed by at least 1 spacer from the index case patient's isolate.

<sup>c</sup> Excluding coprevalent case patients (i.e., contacts with tuberculosis diagnosed within 3 months of enrollment).

of *M. africanum* showed a frameshift mutation in gene *Rv3879c* compared with the same region in *M. tuberculosis* and *M. bovis*. As a result, *Rv3879c* is a pseudogene in *M. africanum* [18]. A transposon mutant of the *Rv3879c* homologue in *Mycobacterium marinum*, a mycobacterium species that also contains RD1, showed undetectable levels of ESAT-6 in the culture filtrate but normal levels of ESAT-6 in cell lysate [21]. When *Rv3879c* is nonfunctional, ESAT-6 secretion may be impaired, and this would explain the attenuated ESAT-6 response induced by *M. africanum*. Therefore, although reduced secretion of ESAT-6 may impair the cell-to-cell spread of the bacterium and possibly explain its lower progression to disease, that reduced secretion could also facilitate immune evasion, balancing selective pressures on the pathogen's evolution. These findings suggest a role for RD1 in within-host but not between-host interactions.

Although the above provides a potential molecular explanation (i.e., a proximal cause) for why *M. africanum* infection exhibits slower disease progression than *M. tuberculosis* infection, it does not address the ultimate evolutionary reason for this difference. The development of active disease is a sine qua non for the organism to spread to new susceptible hosts. Ecological theory predicts that, under such conditions, a trade-off between transmission and virulence (or latency) can emerge and that increased access to susceptible hosts could favor increases in virulence and/or reduced latency [22–24]. We hypothesize that *M. africanum* became endemic in West Africa before the introduction of *M. tuberculosis* through European contact, when human populations were comparably small in West Africa. This scenario is supported by the higher diversity in genotype patterns within the *M. africanum* lineage relative to the different *M. tuberculosis* lineages in The Gambia and the dominance of the Euro-American variants among the latter (B.C.d.J. et al., unpublished data). Longer latency in *M. africanum* might be an adaptation to low host densities, whereas a reduced latency period (i.e., increased “virulence”) in *M. tuberculosis* infections might be an adaptation reflecting the crowded conditions and high rates of tuberculosis in European cities at the time of European colonization. Interestingly, we have found that *M. africanum* is associated with members of the Fulani tribe, who are nomadic pastoralists (B.C.d.J. et al., unpublished data). Nomadic populations tend to be significantly smaller than populations of sedentary agriculturalists, such as the Mandinka, the other major ethnic group in The Gambia.

The finding that the *M. tuberculosis* Beijing lineage was more likely than *M. africanum* to lead to tuberculosis during the 2-year follow-up is consistent with experimental results. Phenoglycolipids produced by Beijing isolates prevent mice from mounting an effective immune response [8, 25]. Our findings suggest that the global dissemination of the Beijing lineage [26], indicative of relatively increased pathogenicity, results from a propensity for progression and not from enhanced transmission. The RD174 lineage, the second most likely to lead to tuberculosis among

household contacts, has a deletion in the DosR regulon, a region that is up-regulated under in vitro conditions thought to mimic latency [27]. Isolates with the RD174 deletion lead to chains of transmission with shorter periods between successive cases in San Francisco (K.D., unpublished data).

We have previously demonstrated an attenuated ESAT-6 response in case patients and contacts infected with *M. africanum* [18], which precluded the use of ELISPOT positivity to assess transmission. The skin test is not without limitations, however. Prevalent TST positivity may reflect prior exposure to the *M. tuberculosis* complex or environmental nontuberculous mycobacteria, or it may reflect prior BCG vaccination. Moreover, the “boosting phenomenon,” whereby an initial negative TST result is followed by a positive result owing to the activation of memory T cells, may have accounted for some of the incident TST positivity at the 3-month follow-up visit. However, we have no grounds to suspect that these confounders were differentially distributed between individuals infected with the different genotypic lineages, and the TST has proved highly specific for recent *M. tuberculosis* complex infection in The Gambia [28].

By assessing concordance of genotypes between secondary and index case patients in those with an available isolate, we have shown that the majority of secondary case patients were infected via their respective index patient; the source of *M. tuberculosis* was the index patient 67% of the time. We expect misclassification bias from the other 33% of situations to lead to an underestimation of the relatively reduced rate of *M. africanum* progression to disease. Indeed, when we excluded the 6 diseased contacts known to have a discordant genotype and reanalyzed the data, the significance of the association between mycobacterial subspecies and progression to disease increased despite the smaller number of secondary case patients analyzed. In the analysis of progression to disease, we did not distinguish between coprevalent and incident secondary cases. However, when the analysis was limited to incident secondary case patients (i.e., those who developed tuberculosis  $\geq 3$  months after enrollment, the association remained significant despite the halving in numbers. Although HIV-infected contacts were excluded from this analysis of mycobacterial factors affecting rates of transmission and progression to disease, the rate of progression to active disease was significantly higher among HIV-infected contacts (8.7% vs. 2.3%;  $P = .005$ ) [17].

In summary, our findings confirm the importance of mycobacterial factors in the variability in progression to tuberculosis disease in humans. The contribution of pathogen factors to the outcome of mycobacterial infections has implications for understanding tuberculosis epidemics and the development and assessment of new interventions, specifically vaccines and treatments for latent tuberculosis infection. Further studies in other settings can identify specific lineages with high and low predilection for progression to disease, and detailed molecular analyses

may provide fresh insights for the development of new interventions.

## Acknowledgments

We thank the tuberculosis workers in The Gambia for their excellent work, the study participants for their time and cooperation, and Hilton Whittle, Paulus de Jong, Julie Parsonnet, and Joel Ernst for critical reading of the manuscript.

## References

1. World Health Organization. 2007 Tuberculosis facts. World Health Organization, 2007.
2. Gustafson P, Lisse I, Gomes V, et al. Risk factors for positive tuberculin skin test in Guinea-Bissau. *Epidemiology* 2007; 18:340–7.
3. Grigg ER. The arcana of tuberculosis with a brief epidemiologic history of the disease in the U.S.A. *Am Rev Tuberc* 1958; 78:151–72.
4. Corbett EL, Watt CJ, Walker N, et al. The growing burden of tuberculosis: global trends and interactions with the HIV epidemic. *Arch Intern Med* 2003; 163:1009–21.
5. Malik AN, Godfrey-Faussett P. Effects of genetic variability of *Mycobacterium tuberculosis* strains on the presentation of disease. *Lancet Infect Dis* 2005; 5:174–83.
6. Tsolaki AG, Hirsh AE, DeRiemer K, et al. Functional and evolutionary genomics of *Mycobacterium tuberculosis*: insights from genomic deletions in 100 strains. *Proc Natl Acad Sci USA* 2004; 101:4865–70.
7. Grange JM. *Mycobacterium bovis* infection in human beings. *Tuberculosis (Edinb)* 2001; 81:71–7.
8. Lopez B, Aguilar D, Orozco H, et al. A marked difference in pathogenesis and immune response induced by different *Mycobacterium tuberculosis* genotypes. *Clin Exp Immunol* 2003; 133:30–7.
9. Gagneux S, Small PM. Global phylogeography of *Mycobacterium tuberculosis* and implications for tuberculosis product development. *Lancet Infect Dis* 2007; 7:328–37.
10. Small PM, Hopewell PC, Singh SP, et al. The epidemiology of tuberculosis in San Francisco: a population-based study using conventional and molecular methods. *N Engl J Med* 1994; 330:1703–9.
11. Alland D, Kalkut GE, Moss AR, et al. Transmission of tuberculosis in New York City: an analysis by DNA fingerprinting and conventional epidemiologic methods. *N Engl J Med* 1994; 330:1710–6.
12. Valway SE, Sanchez MP, Shinnick TF, et al. An outbreak involving extensive transmission of a virulent strain of *Mycobacterium tuberculosis*. *N Engl J Med* 1998; 338:633–9.
13. Adegbola RA, Hill P, Baldeh I, et al. Surveillance of drug-resistant *Mycobacterium tuberculosis* in The Gambia. *Int J Tuberc Lung Dis* 2003; 7: 390–3.
14. Kamerbeek J, Schouls L, Kolk A, et al. Simultaneous detection and strain differentiation of *Mycobacterium tuberculosis* for diagnosis and epidemiology. *J Clin Microbiol* 1997; 35:907–14.
15. Gagneux S, DeRiemer K, Van T, et al. Variable host-pathogen compatibility in *Mycobacterium tuberculosis*. *Proc Natl Acad Sci USA* 2006; 103: 2869–73.
16. Brosch R, Gordon SV, Marmiesse M, et al. A new evolutionary scenario for the *Mycobacterium tuberculosis* complex. *Proc Natl Acad Sci USA* 2002; 99:3684–9.
17. Hill PC, Jackson-Sillah DJ, Fox A, et al. Incidence of tuberculosis and the predictive value of ELISPOT and Mantoux tests in Gambian case contacts. *PLoS ONE* 2008; 3:e1379.
18. de Jong BC, Hill PC, Brookes RH, et al. *Mycobacterium africanum* elicits an attenuated T cell response to early secreted antigenic target, 6 kDa, in patients with tuberculosis and their household contacts. *J Infect Dis* 2006; 193:1279–86.
19. Pym AS, Brodin P, Majlessi L, et al. Recombinant BCG exporting ESAT-6 confers enhanced protection against tuberculosis. *Nat Med* 2003; 9:533–9.
20. Brodin P, Rosenkrands I, Andersen P, Cole ST, Brosch R. ESAT-6 proteins: protective antigens and virulence factors? *Trends Microbiol* 2004; 12:500–8.
21. Gao LY, Guo S, McLaughlin B, Morisaki H, Engel JN, Brown EJ. A mycobacterial virulence gene cluster extending RD1 is required for cytolysis, bacterial spreading and ESAT-6 secretion. *Mol Microbiol* 2004; 53:1677–93.
22. Anderson RM, May RM. Coevolution of hosts and parasites. *Parasitology* 1982; 85(Pt 2):411–26.
23. Lenski RE, May RM. The evolution of virulence in parasites and pathogens: reconciliation between two competing hypotheses. *J Theor Biol* 1994; 169:253–65.
24. Blaser MJ, Kirschner D. The equilibria that allow bacterial persistence in human hosts. *Nature* 2007; 449:843–9.
25. Reed MB, Domenech P, Manca C, et al. A glycolipid of hypervirulent tuberculosis strains that inhibits the innate immune response. *Nature* 2004; 431:84–7.
26. Bifani PJ, Mathema B, Kurepina NE, Kreiswirth BN. Global dissemination of the *Mycobacterium tuberculosis* W-Beijing family strains. *Trends Microbiol* 2002; 10:45–52.
27. Voskuil MI, Schnappinger D, Visconti KC, et al. Inhibition of respiration by nitric oxide induces a *Mycobacterium tuberculosis* dormancy program. *J Exp Med* 2003; 198:705–13.
28. Hill PC, Jeffries DJ, Brookes RH, et al. Using ELISPOT to expose false positive skin test conversion in tuberculosis contacts. *PLoS ONE* 2007; 2:e183.
